# Supplementary material for: Significant Differences in Physicochemical Properties of Human Immunoglobulin Kappa and Lambda CDR3 Regions
Source: PubMed Central journal article supplement (PMC5037968; doi:10.3389/fimmu.2016.00388), 2016-09-27
Supplement: Data_Sheet_1.pdf [file Data_Sheet_1.pdf]

## *Supplementary Material*

### **Significant differences in physicochemical properties of human immunoglobulin kappa and lambda CDR3 regions**

Catherine L. Townsend<sup>1</sup>, Julie M.J. Laffy<sup>2</sup>, Yu-Chang Wu<sup>1</sup>, Joselli Silva O'Hare<sup>1</sup>, Victoria Martin<sup>1</sup>, David Kipling<sup>3</sup>, Franca Fraternali<sup>2</sup>, Deborah K. Dunn-Walters<sup>1,4\*</sup>

\*Correspondence: Deborah Dunn-Walters: d.dunn-walters@surrey.ac.uk

#### **1 Supplementary Tables**

| Donor ID     | Donor Age | Number of sequences |             |              |
|--------------|-----------|---------------------|-------------|--------------|
|              |           | Kappa               | Lambda      | Heavy        |
| 122          | 24        | 1464                | 291         | 1630         |
| 159          | 28        | 1482                | 383         | 2610         |
| 138          | 41        | 909                 | 121         | 2628         |
| 107          | 43        | 1207                | 562         | 0            |
| 120          | 44        | 841                 | 526         | 0            |
| 118          | 49        | 695                 | 323         | 2313         |
| 146          | 50        | 1039                | 364         | 3905         |
| 128          | 52        | 606                 | 383         | 0            |
| 103          | 52        | 688                 | 316         | 1646         |
| 126          | 53        | 1557                | 735         | 0            |
| 141          | 65        | 2039                | 1048        | 2570         |
| 105          | 67        | 661                 | 395         | 0            |
| 119          | 68        | 2178                | 1118        | 4172         |
| 160          | 70        | 899                 | 181         | 2643         |
| 111          | 71        | 773                 | 503         | 1380         |
| 149          | 72        | 729                 | 489         | 1931         |
| 132          | 76        | 923                 | 399         | 0            |
| 162          | 78        | 771                 | 190         | 0            |
| 140          | 86        | 1110                | 549         | 1588         |
| <b>Total</b> |           | <b>20571</b>        | <b>8876</b> | <b>29016</b> |

**Supplementary Table 1: Donor age and count of the number of sequences used in the analyses.** The age of all 19 donors and the number of sequences contributed per donor for the kappa, lambda and heavy chain datasets used in the analysis.

|                               | Kappa CDR-L3 (N=20,571) |        |          |          | Lambda CDR-L3 (N=8,876) |        |          |          |
|-------------------------------|-------------------------|--------|----------|----------|-------------------------|--------|----------|----------|
|                               | Mean                    | SD     | L 95% CI | U 95% CI | Mean                    | SD     | L 95% CI | U 95% CI |
| <b>CDR-L3 length (AA)</b>     | 9.199                   | 1.193  | 9.183    | 9.215    | 10.533                  | 1.277  | 10.507   | 10.560   |
| <b>GRAVY Index</b>            | -1.459                  | 0.584  | -1.467   | -1.451   | -0.049                  | 0.574  | -0.061   | -0.037   |
| <b>Boman Index</b>            | 2.654                   | 1.134  | 2.638    | 2.669    | 1.161                   | 1.105  | 1.138    | 1.184    |
| <b>Aliphatic Index</b>        | 26.778                  | 30.212 | 26.365   | 27.191   | 63.536                  | 27.382 | 62.966   | 64.106   |
| <b>Isoelectric Point</b>      | 7.244                   | 2.166  | 7.214    | 7.273    | 5.673                   | 1.786  | 5.636    | 5.710    |
| <b>Frequency Small AA</b>     | 0.487                   | 0.094  | 0.486    | 0.489    | 0.742                   | 0.097  | 0.740    | 0.744    |
| <b>Frequency Tiny AA</b>      | 0.310                   | 0.134  | 0.308    | 0.312    | 0.516                   | 0.149  | 0.513    | 0.519    |
| <b>Frequency Polar AA</b>     | 0.608                   | 0.103  | 0.606    | 0.609    | 0.495                   | 0.159  | 0.492    | 0.498    |
| <b>Frequency Non-Polar AA</b> | 0.392                   | 0.103  | 0.391    | 0.394    | 0.505                   | 0.159  | 0.502    | 0.508    |
| <b>Frequency Aromatic AA</b>  | 0.185                   | 0.086  | 0.184    | 0.186    | 0.156                   | 0.068  | 0.154    | 0.157    |
| <b>Frequency Aliphatic AA</b> | 0.080                   | 0.087  | 0.079    | 0.081    | 0.252                   | 0.108  | 0.250    | 0.254    |
| <b>Frequency Charged AA</b>   | 0.068                   | 0.078  | 0.067    | 0.069    | 0.095                   | 0.098  | 0.093    | 0.097    |
| <b>Frequency Acidic AA</b>    | 0.015                   | 0.039  | 0.014    | 0.015    | 0.061                   | 0.079  | 0.059    | 0.063    |
| <b>Frequency Basic AA</b>     | 0.053                   | 0.071  | 0.052    | 0.054    | 0.034                   | 0.056  | 0.033    | 0.035    |
| <b>Kidera 1</b>               | 0.448                   | 0.253  | 0.444    | 0.451    | 0.285                   | 0.262  | 0.279    | 0.290    |
| <b>Kidera 2</b>               | 0.018                   | 0.260  | 0.014    | 0.021    | -0.466                  | 0.212  | -0.470   | -0.461   |
| <b>Kidera 3</b>               | 0.158                   | 0.216  | 0.155    | 0.161    | 0.219                   | 0.346  | 0.211    | 0.226    |
| <b>Kidera 4</b>               | 0.218                   | 0.202  | 0.216    | 0.221    | -0.017                  | 0.215  | -0.021   | -0.012   |
| <b>Kidera 5</b>               | 0.165                   | 0.173  | 0.162    | 0.167    | -0.178                  | 0.198  | -0.182   | -0.174   |
| <b>Kidera 6</b>               | -0.087                  | 0.194  | -0.089   | -0.084   | -0.293                  | 0.184  | -0.297   | -0.289   |
| <b>Kidera 7</b>               | 0.019                   | 0.214  | 0.016    | 0.022    | -0.621                  | 0.310  | -0.628   | -0.615   |
| <b>Kidera 8</b>               | -0.424                  | 0.272  | -0.428   | -0.421   | -0.196                  | 0.352  | -0.203   | -0.189   |
| <b>Kidera 9</b>               | -0.142                  | 0.261  | -0.145   | -0.138   | -0.413                  | 0.202  | -0.417   | -0.409   |
| <b>Kidera 10</b>              | -0.505                  | 0.228  | -0.508   | -0.501   | 0.050                   | 0.194  | 0.046    | 0.055    |

**Supplementary Table 2: Statistics for the measured CDR-L3 properties.** The mean, standard deviation (SD), lower 95% confidence interval (L 95% CI) and upper 95% confidence interval (U 95% CI) of the kappa and lambda repertoires (all cell types). AA = amino acids.

### 3 Supplementary Figures

**A**

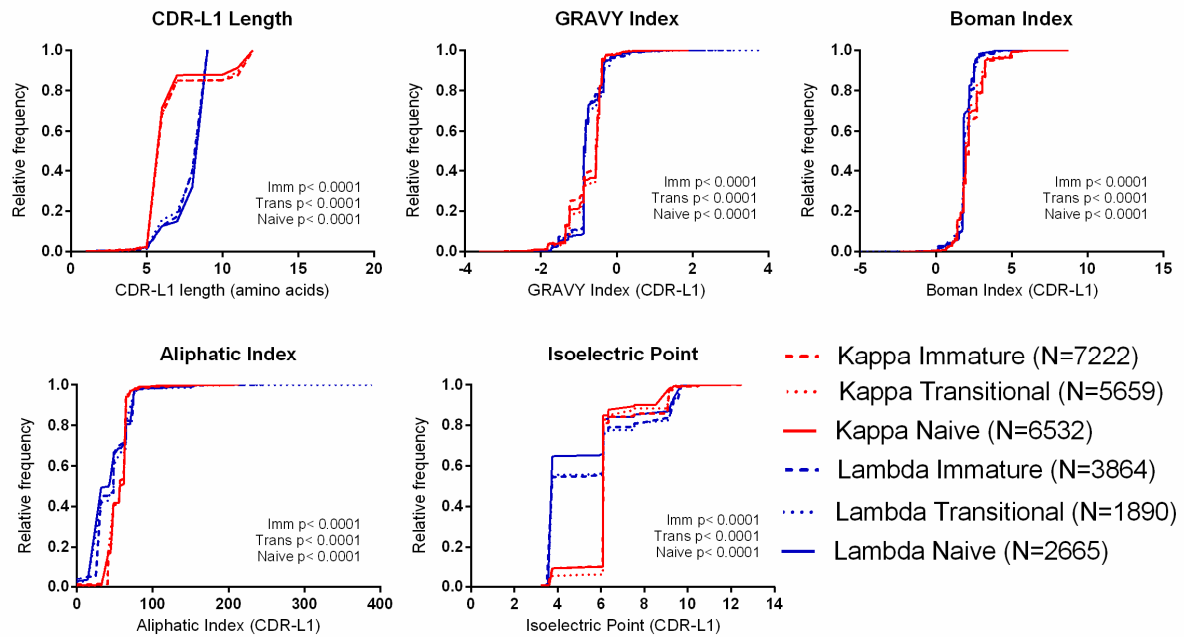

**B**

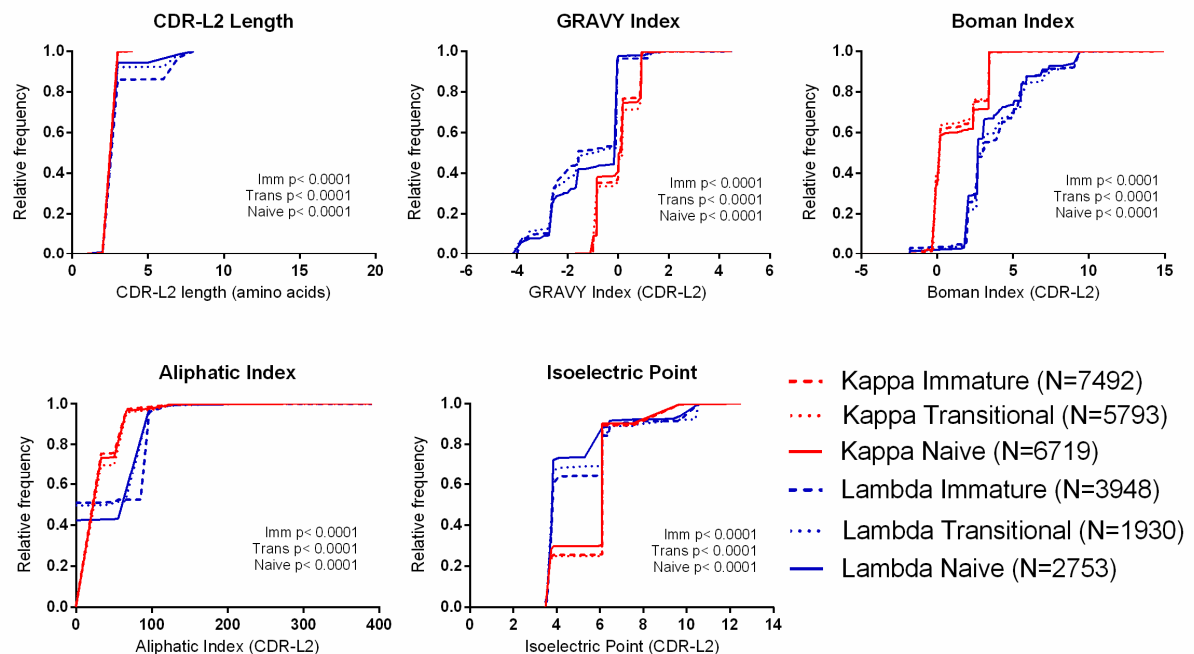

**Supplementary Figure 1: Physicochemical properties of kappa and lambda CDR-L1 and CDR-L2 regions.** A) Physicochemical properties of CDR-L1 regions. B) Physicochemical properties of CDR-L2 regions. All CDR-L1 and CDR-L2 physicochemical properties are significantly different ( $p < 0.0001$ ; KS test) between kappa and lambda isotypes. CDR-L1 and CDR-L2 are encoded within the IGLV gene so there is a lot less variation in these CDR regions compared to the CDR-L3; there are therefore many duplicate values, resulting in irregular distributions.

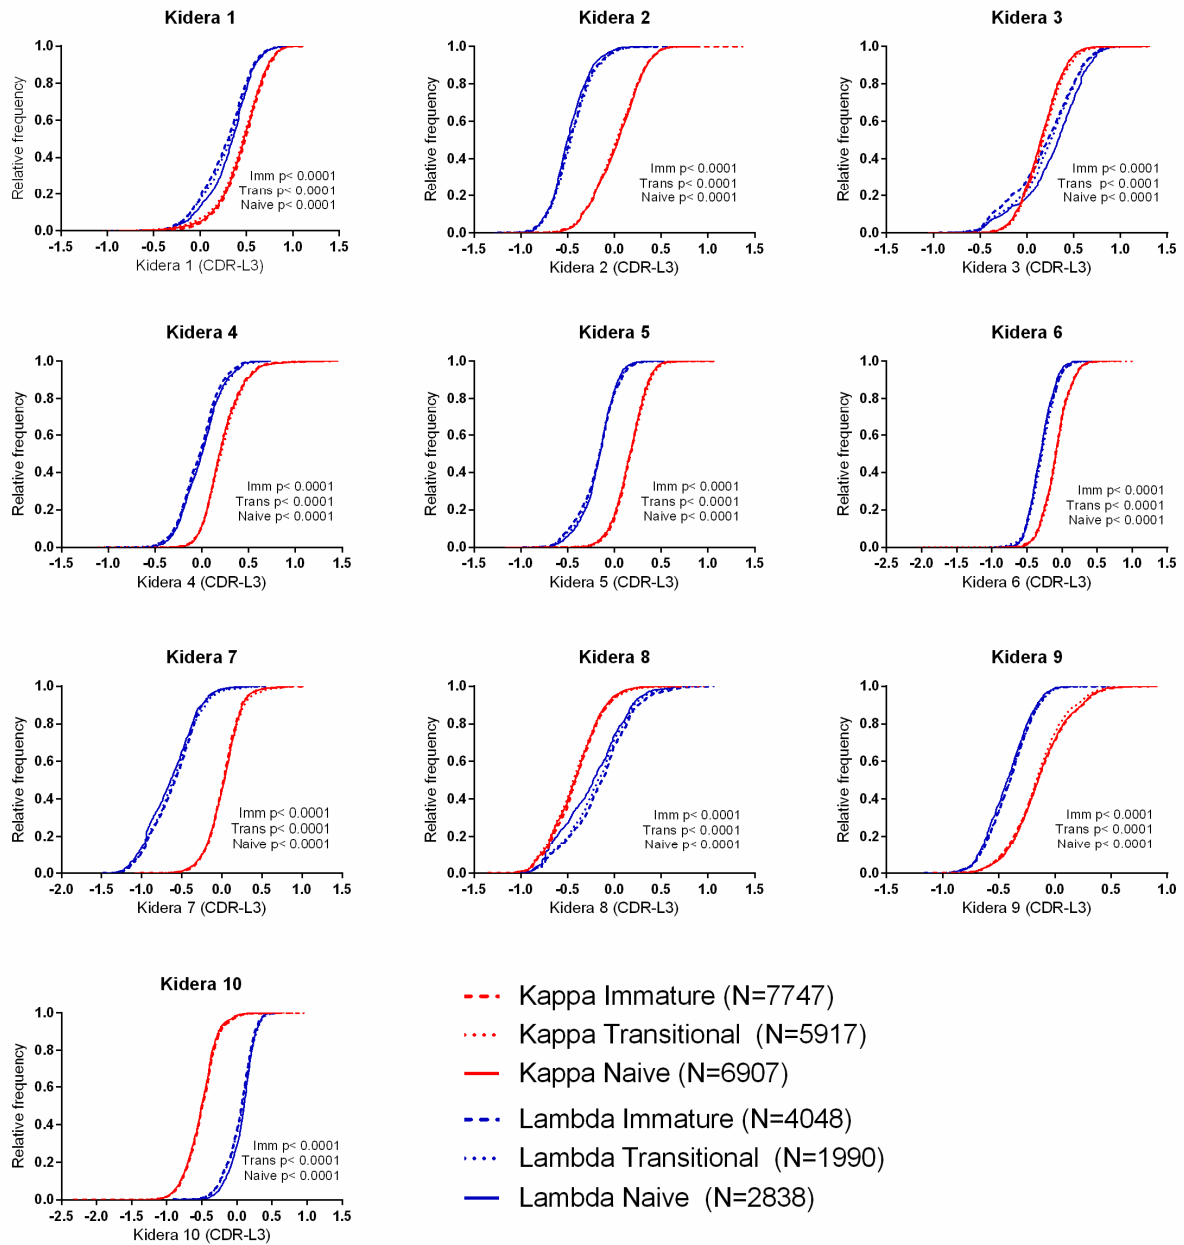

**Supplementary Figure 2: Kappa and lambda CDR-L3 Kidera factors.** Cumulative frequency histograms of the ten Kidera factors of kappa (red) and lambda (blue) CDR-L3 regions for each cell type (immature, transitional and naïve). In every case, the distributions of the kappa and lambda repertoires for each cell type were significantly different ( $p < 0.0001$ , Kolmogorov-Smirnov test).

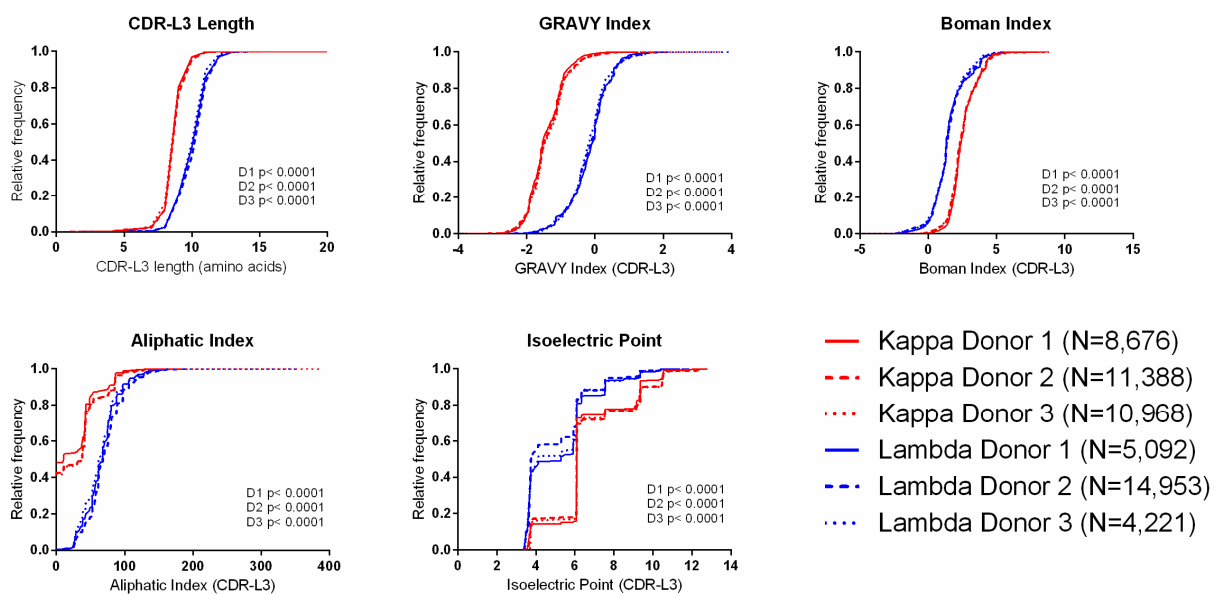

**Supplementary Figure 3: Physicochemical properties of CDR-L3 regions from light chains from the literature.** Kappa and lambda CDR-L3 regions separate in the same way as the kappa and lambda CDR-L3 regions from our dataset shown in Figure 1A.
